# Supplementary material
Source: ML conference proceedings conference paper supplement (https://proceedings.mlr.press/v139/liu21m.html)
Supplement: Supplementary file [file liu21m-supp.pdf]

## A. Regularizing with variational objective

We provide the full derivation of Equation (2) in the following:

$$\begin{aligned}
 I(z_t^a; \zeta_t^a, \mathbf{s}_t) &= \mathbb{E}_{\mathbf{s}_t, z_t^a, \zeta_t^a} \left[ \log \frac{p(z_t^a | \zeta_t^a, \mathbf{s}_t)}{p(z^a | \mathbf{s}_t)} \right] && // \text{by the definition of mutual information} \\
 &= \mathbb{E}_{\mathbf{s}_t, z_t^a, \zeta_t^a} \left[ \log \frac{q_\xi(z_t^a | \zeta_t^a, \mathbf{s}_t)}{p(z^a | \mathbf{s}_t)} \right] + \text{KL} \left( p(z_t^a | \zeta_t^a, \mathbf{s}_t), q_\xi(z_t^a | \zeta_t^a, \mathbf{s}_t) \right) \\
 &\geq \mathbb{E}_{\mathbf{s}_t, z_t^a, \zeta_t^a} \left[ \log \frac{q_\xi(z_t^a | \zeta_t^a, \mathbf{s}_t)}{p(z^a | \mathbf{s}_t)} \right] && // \text{since } \text{KL}(\cdot, \cdot) \geq 0 \\
 &= \mathbb{E}_{\mathbf{s}_t, z_t^a, \zeta_t^a} \left[ \log q_\xi(z_t^a | \zeta_t^a, \mathbf{s}_t) \right] + H(z_t^a | \mathbf{s}_t).
 \end{aligned} \tag{5}$$

## B. Proof of Theorem 1

In this section we provide the proof for Theorem 1.

**Theorem 1.** Denote the optimal action-value and value functions by  $Q_*^{\text{tot}}$  and  $V_*^{\text{tot}}$ . Denote the action-value and value functions corresponding to receiving new strategies every time from the coach by  $Q^{\text{tot}}$  and  $V^{\text{tot}}$ , and those corresponding to following the strategies distributed according to (3) as  $\tilde{Q}$  and  $\tilde{V}$ , i.e.  $\tilde{V}(\boldsymbol{\tau}_t | \tilde{\mathbf{z}}_t; \mathbf{c}) = \max_{\mathbf{u}} \tilde{Q}(\boldsymbol{\tau}_t, \mathbf{u} | \tilde{\mathbf{z}}_t; \mathbf{c})$ . Assume for any trajectory  $\boldsymbol{\tau}_t$ , actions  $\mathbf{u}_t$ , current state  $\mathbf{s}_t$ , the most recent state the coach distributes strategies  $\mathbf{s}_{\hat{t}}$ , and the players' characteristics  $\mathbf{c}$ ,  $\|Q^{\text{tot}}(\boldsymbol{\tau}_t, \mathbf{u}_t, f(\mathbf{s}_{\hat{t}}); \mathbf{c}) - Q_*^{\text{tot}}(\mathbf{s}_t, \mathbf{u}_t; \mathbf{c})\|_2 \leq \kappa$ , and for any strategies  $z_1^a, z_2^a$ ,  $|Q^{\text{tot}}(\boldsymbol{\tau}_t, \mathbf{u}_t | z_1^a, z_2^a; \mathbf{c}) - Q^{\text{tot}}(\boldsymbol{\tau}_t, \mathbf{u}_t | z_2^a, z_1^a; \mathbf{c})| \leq \eta \|z_1^a - z_2^a\|_2$ . If the used team strategies  $\tilde{\mathbf{z}}_t$  satisfies  $\forall a, t, \|\tilde{z}_t^a - z_t^a\|_2 \leq \beta$ , then we have

$$\|V_*^{\text{tot}}(\mathbf{s}_t; \mathbf{c}) - \tilde{V}(\boldsymbol{\tau}_t | \tilde{\mathbf{z}}_t; \mathbf{c})\|_\infty \leq \frac{2(n_a \eta \beta + \kappa)}{1 - \gamma}, \tag{6}$$

where  $n_a$  is the number of agents and  $\gamma$  is the discount factor.

To summarize, the assumptions assume that the learned action-value function  $Q^{\text{tot}}$  approximates the optimal  $Q_*^{\text{tot}}$  well and has bounded Lipschitz constant with respect to individual action-value functions. Moreover, we assume the individual action-value functions also have bounded Lipschitz constant with respect to the strategies.

*Proof.* According to Assumption 2, if  $\|\tilde{z}_t^a - z_t^a\|_2 \leq \beta$  for all  $a$ , then

$$|Q^{\text{tot}}(\boldsymbol{\tau}_t, \mathbf{u}_t | \tilde{\mathbf{z}}_t, \mathbf{c}) - Q^{\text{tot}}(\boldsymbol{\tau}_t, \mathbf{u}_t | \mathbf{z}_t, \mathbf{c})| \leq \sum_{a_i, 1 \leq i \leq n_a} \eta_1 \eta_2 \|\tilde{z}_t^a - z_t^a\|_2 \leq n_a \eta_1 \eta_2 \beta. \tag{7}$$

For notation convenience, we ignore the superscript of *tot* and the condition on  $\mathbf{c}$ . For a state  $\mathbf{s}$ , denote the action the learned policy take as  $\mathbf{u}^\dagger$ , i.e.  $\mathbf{u}^\dagger \triangleq \text{argmax}_{\mathbf{u}} Q(\boldsymbol{\tau}, \mathbf{u})$ . Similarly we can define  $\mathbf{u}^*$  and  $\tilde{\mathbf{u}}$  as the action one would take according to the optimal  $Q_*$  and the action-value  $\tilde{Q}$  estimated using the old strategy. From Assumption 1, we know that

$$Q_*(\mathbf{s}, \mathbf{u}^\dagger) \geq Q(\boldsymbol{\tau}, \mathbf{u}^\dagger) - \kappa \geq Q(\boldsymbol{\tau}, \mathbf{u}^*) - \kappa \geq Q_*(\mathbf{s}, \mathbf{u}^*) - 2\kappa. \tag{8}$$

Therefore taking  $\mathbf{u}^\dagger$  will result in at most  $2\kappa$  performance drop at this single step. Similarly, denote  $\epsilon_0 = n_a \eta_1 \eta_2 \beta$ , then

$$Q(\boldsymbol{\tau}, \tilde{\mathbf{u}}) \geq \tilde{Q}(\boldsymbol{\tau}, \tilde{\mathbf{u}}) - \epsilon_0 \geq \tilde{Q}(\boldsymbol{\tau}, \mathbf{u}^\dagger) - \epsilon_0 \geq Q(\boldsymbol{\tau}, \mathbf{u}^\dagger) - 2\epsilon_0. \tag{9}$$

Hence  $Q_*(\mathbf{s}, \tilde{\mathbf{u}}) \geq Q_*(\mathbf{s}, \mathbf{u}^*) - 2(\epsilon_0 + \kappa)$ . Note that this means taking the action  $\tilde{\mathbf{u}}$  in the place of  $\mathbf{u}^*$  at state  $\mathbf{s}$  will result in at most  $2(\epsilon_0 + \kappa)$  performance drop. This conclusion generalizes to any step  $t$ . Therefore, if at each single step the performance is bounded within  $2(\epsilon_0 + \kappa)$ , then overall the performance is within  $2(\epsilon_0 + \kappa)/(1 - \gamma)$ .  $\square$

## C. Training Details

For both Resource Collection and Rescue Game, we set the max total number of training steps to 5 million. Then we use the exponentially decayed  $\epsilon$ -greedy algorithm as our exploration policy, starting from  $\epsilon_0 = 1.0$  to  $\epsilon_n = 0.05$ . We parallelize the

**Coach-Player Multi-Agent Reinforcement Learning**

| Name                    | Description                                            | Value       |
|-------------------------|--------------------------------------------------------|-------------|
| $ \mathcal{D} $         | replay buffer size                                     | 100000      |
| $n_{\text{head}}$       | number of heads in multi-head attention                | 4           |
| $n_{\text{thread}}$     | number of parallel threads for running the environment | 8           |
| $dh$                    | the hidden dimension of all modules                    | 128         |
| $\gamma$                | the discount factor                                    | 0.99        |
| $lr$                    | learning rate                                          | 0.0003      |
|                         | optimizer                                              | RMSprop     |
| $\alpha$                | $\alpha$ value in RMSprop                              | 0.99        |
| $\epsilon$              | $\epsilon$ value in RMSprop                            | 0.00001     |
| $n_{\text{batch}}$      | batch size                                             | 256         |
| grad clip               | clipping value of gradient                             | 10          |
| target update frequency | how frequent do we update the target network           | 200 updates |
| $\lambda_1$             | $\lambda_1$ in variational objective                   | 0.001       |
| $\lambda_2$             | $\lambda_2$ in variational objective                   | 0.0001      |

*Table 3.* Hyper-parameters in Resource Collection and Rescue Game.

environment with 8 threads for training. Experiments are run on the GeForce RTX 2080 GPUs. We provide the algorithm hyper-parameters in Table 3.

For StarCraft Micromanagement, we follow the same setup from (Iqbal et al., 2020) and train all methods on the 3-8sz and 3-8MMM maps for 12 millions steps. To regularize the learning, we use  $\lambda_1 = 0.00005$  and  $\lambda_2 = 0.000005$  for both maps. For all experiments, we set the default period before centralization to  $T = 4$ .
